# Supplementary material
Source: Springer Nature journal article supplement (https://www.springermedizin.de/resource/supplementary/12891_2009_775_MOESM2_ESM.pdf/9506982)
Supplement: MOESM2 [file 9506982]

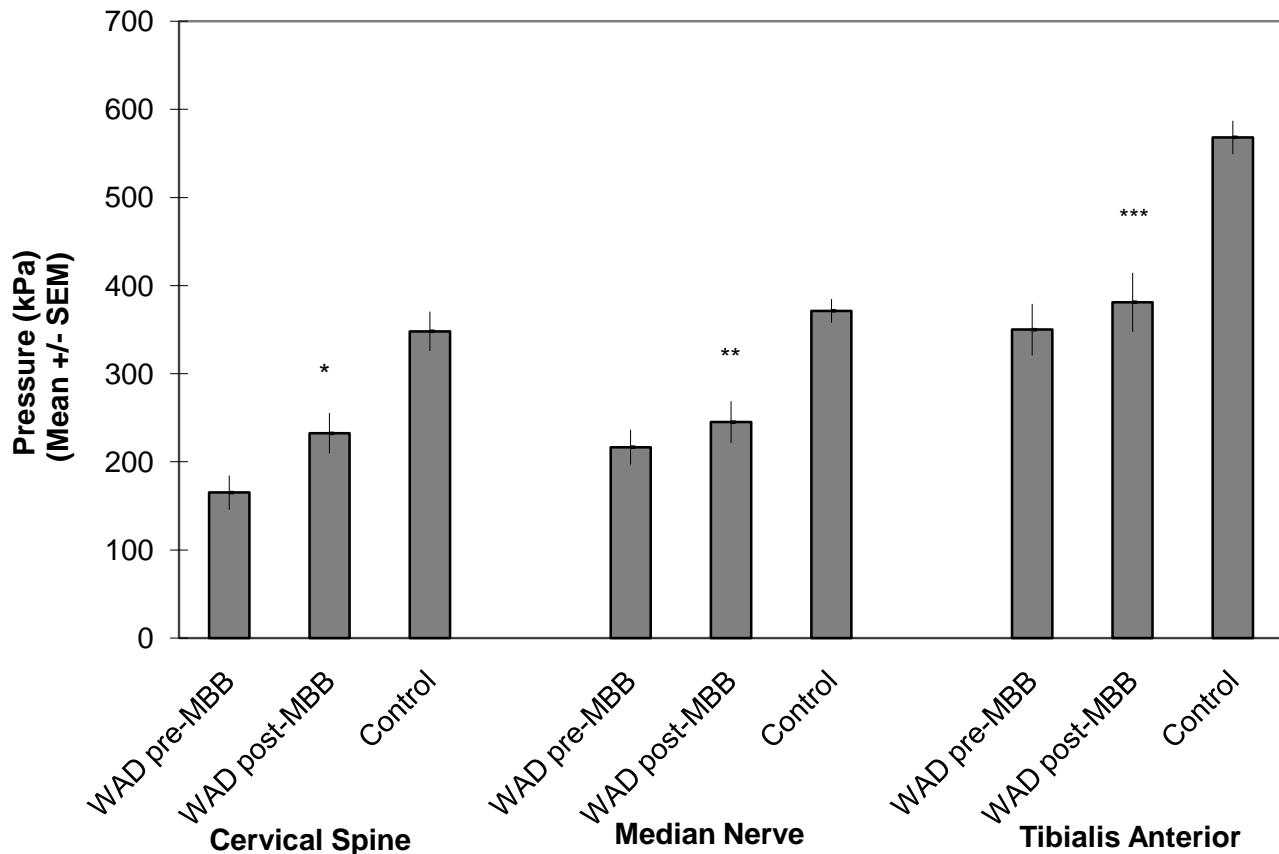

\*Significant differences noted between pre-MBB and post-MBB ( $p < 0.001$ )

\*\*Significant differences noted between pre-MBB and post-MBB ( $p = 0.027$ )

\*\*\*Significant differences noted between pre-MBB and post-MBB ( $p < 0.002$ )
